# Supplementary material for: A hetero-alkali metallic (Na, K) three-dimensional supramolecular assembly based on p-sulfonatothiacalix[4]arene
Source: Royal Society of Chemistry journal article supplement (doi:10.1039/c4ra15628e), 2015-01-01
Supplement: c4ra15628e1.pdf [file c4ra15628e1.pdf]

## Electronic Supporting Information

### Hetero-alkali metallic (Na, K) three-dimensional supramolecular assembly based on *p*- sulfonatocalix[4]arene

**Kunda Uma Maheswara Rao,<sup>a</sup> Manabu Yamada,<sup>b</sup> Takashi Kimuro,<sup>c</sup> Hiroshi  
Katagiri,<sup>d</sup> Yoshihiki Kondo<sup>e</sup> and Fumio Hamada<sup>\*c</sup>.**

<sup>a</sup>*Venture Business Laboratory, Akita University, 1-1 Tegatagakuen-machi, Akita, 010-8502, Japan.*

<sup>b</sup>*Research Center for Engineering Science, Graduate School of Engineering and Resource Science, Akita University, 1-1 Tegatagakuen-machi, Akita, 010-8502, Japan.*

<sup>\*c</sup>*Department of Applied Chemistry for Environments, Graduate School of Engineering and Resource Science, Akita University, 1-1 Tegatagakuen-machi, Akita, 010-8502, Japan. Tel/Fax: +81 18 889 2440. E-mail: hamada@gipc.akita-u.ac.jp.*

<sup>d</sup>*Graduate School of Science and Engineering, Yamagata University, 4-3-16 Jonan, Yonezawa, Yamagata, 992-8510, Japan.*

<sup>e</sup>*Department of Life Science, Graduate School of Engineering and Resource Science, Akita University, 1-1 Tegatagakuen-machi, Akita, 010-8502, Japan.*

## **Supporting Information Comprises of**

### **Physical measurements and Characterization data of complex 4 & 5**

**Supplementary Fig. S1:** Coordination environment of K1.

**Supplementary Fig. S2:** Coordination environment of K2.

**Supplementary Fig. S3:** Coordination environment of K3.

**Supplementary Fig. S4:** Coordination environment of K4.

**Supplementary Fig. S5:** Coordination environment of K5.

**Supplementary Fig. S6:** Thermogravimetric analysis of complex 5.

**Supplementary Fig. S7:** PXRD patterns of complex 5.

**Physical measurements:**

Fourier transform infrared (FT-IR) spectra were measured using Thermo Fisher Scientific Nicolet iS5 spectrophotometer (attenuated total reflection (ATR) method). MR data were recorded on JEOL 600SSS ECA-600 instrument. Chemical shifts are quoted as parts per million (ppm) relative to tetramethylsilane (CDCl<sub>3</sub>). Melting points were determined by using Yanaco, MP-500P apparatus. Powder X-ray diffractions (PXRD) were collected with a Rigaku Ultima 1V diffractometer by using Cu K $\alpha$  radiation ( $\lambda = 1.5406 \text{ \AA}$ , 40 kV, 40 mA) with a graphite monochromator at a step wise width of 0.02° 2theta and a scan speed 2.000°/min. Thermogravimetric analysis (TGA) was recorded on Thermoplus TG8120 (Rigaku Corp.) thermogravimetric analyzer under nitrogen atmosphere. The temperature was raised at 10 °C/min. to 800 °C. elemental analysis was performed using CE-440 elemental analyzer (System Engineering Inc)

**Characterization of compound 5:** m.p (°C): 231.8-232.1; IR (cm<sup>-1</sup>): 3438.72 (OH), 3053.99 (Ar-CH), 1144.71 (S=O); <sup>1</sup>H-NMR (D<sub>2</sub>O, DSS, ppm): 7.85 (8H, s, Ar). Anal. Calcd. for C<sub>24</sub>H<sub>10</sub>O<sub>16</sub>S<sub>8</sub>Na<sub>2</sub>K<sub>4</sub> · 5.5 H<sub>2</sub>O (%): C, 25.91; H, 1.90; found (%): C, 25.61; H, 1.46.

**Characterization of compound 4:** m.p (°C): over 420 °C (dec), IR (cm<sup>-1</sup>): 3327.98 (OH), 3051.55 (Ar-CH), 1151.39 (S=O); <sup>1</sup>H-NMR (D<sub>2</sub>O, DSS, ppm): 8.04 (8H, s, Ar), 3.64 (q, 2H, CH<sub>3</sub>CH<sub>2</sub>OH), 3.36 (s, 1H, CH<sub>3</sub>CH<sub>2</sub>OH), 1.15 (t, 3H, CH<sub>3</sub>CH<sub>2</sub>OH). Anal. Calcd. for C<sub>24</sub>H<sub>12</sub>O<sub>16</sub>S<sub>8</sub>Na<sub>4</sub> · C<sub>2</sub>H<sub>5</sub>OH (%): C, 32.83; H, 1.90; found (%): C, 32.71; H, 1.78.

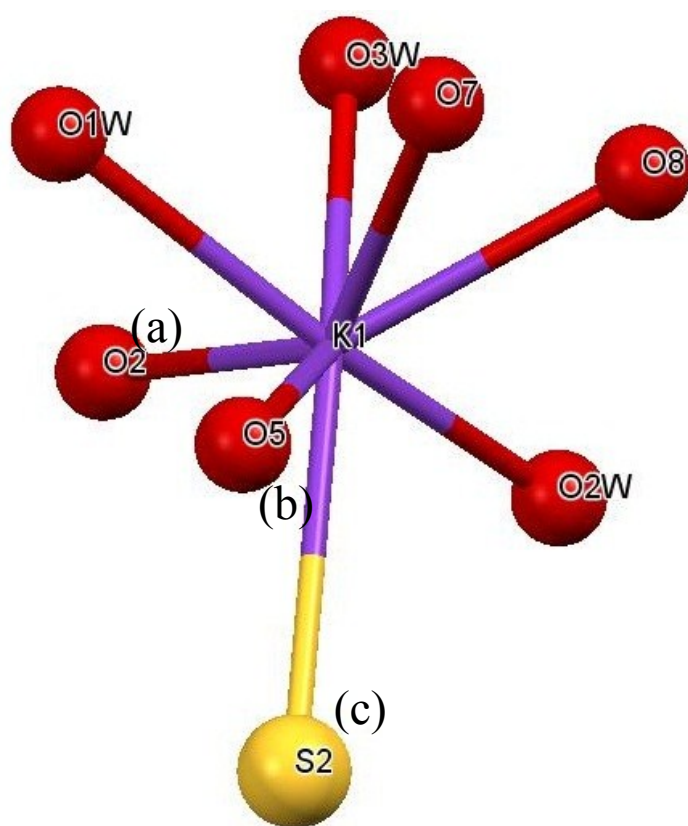

**Fig. S1:** Coordination environment of K1. It coordinated to three water molecules (O1W, O2W, O3W) three sulfonic acid oxygens (O2,<sup>a</sup> O7, O8) of different **2** units, one phenolic oxygen (O5<sup>b</sup>) and one bridged sulfur (S2<sup>c</sup>). Symmetry elements: <sup>a</sup>,  $x, y, -1+z$ ; <sup>b</sup>,  $-x, 1-y, 1-z$ ; <sup>c</sup>,  $-x, 1-y, 1-z$ .

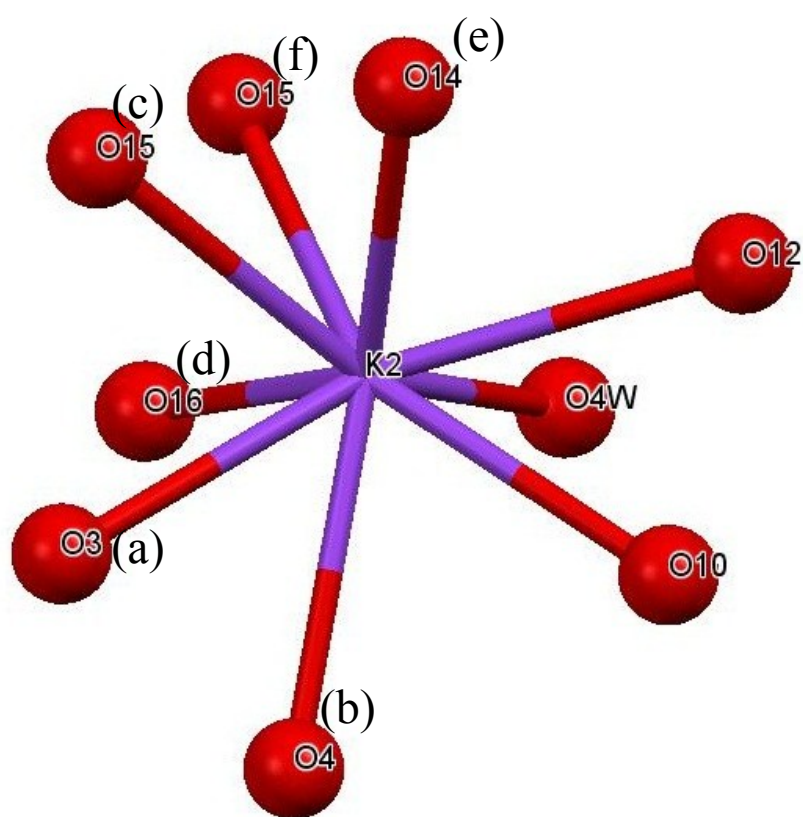

**Fig. S2:** Coordination environment of K2. It coordinated to one water molecule (O4W), eight sulfonic acid oxygens(O3,<sup>a</sup> O4,<sup>b</sup> O15,<sup>c</sup> O16,<sup>d</sup> O14,<sup>e</sup> O15,<sup>f</sup> O10, O12) of different 2 units.Symmetry elements: <sup>a</sup>,  $-x, 2-y, 1-z$ ; <sup>b</sup>,  $-x, 2-y, 1-z$ ; <sup>c</sup>,  $x, y, -1+z$ ; <sup>d</sup>,  $x, y, -1+z$ ; <sup>e</sup>,  $1-x, 2-y, 1-z$ ; <sup>f</sup>,  $1-x, 2-y, 1-z$ .

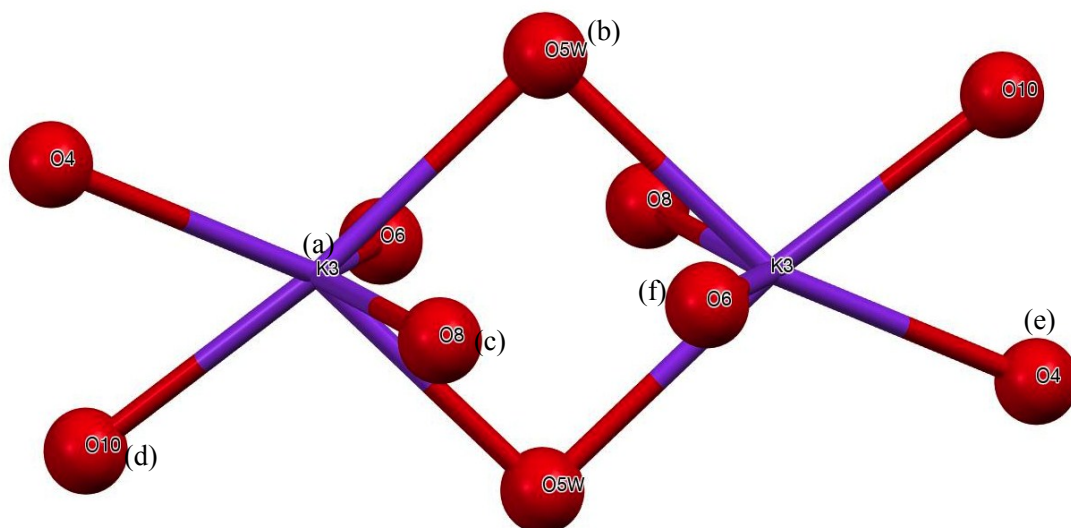

**Fig. S3:** (a) Coordination environment of K3. K3 and K3<sup>a</sup> of different units connected to each other through bridged water molecule (O5W and O5W<sup>b</sup>) and one K3 coordinated four sulfonic acid oxygens (O8, O10, O4, O6<sup>f</sup>) of different 2 units. (b) bridge like coordination between two K3, O5W and O6W. Symmetry elements: <sup>a</sup>, -x, 2-y, 1-z; <sup>b</sup>, -x, 2-y, 1-z; <sup>c</sup>, -x, 2-y, 1-z; <sup>d</sup>, -x, 2-y, 1-z; <sup>e</sup>, -x, 2-y, 1-z; <sup>f</sup>, -x, 2-y, 1-z.

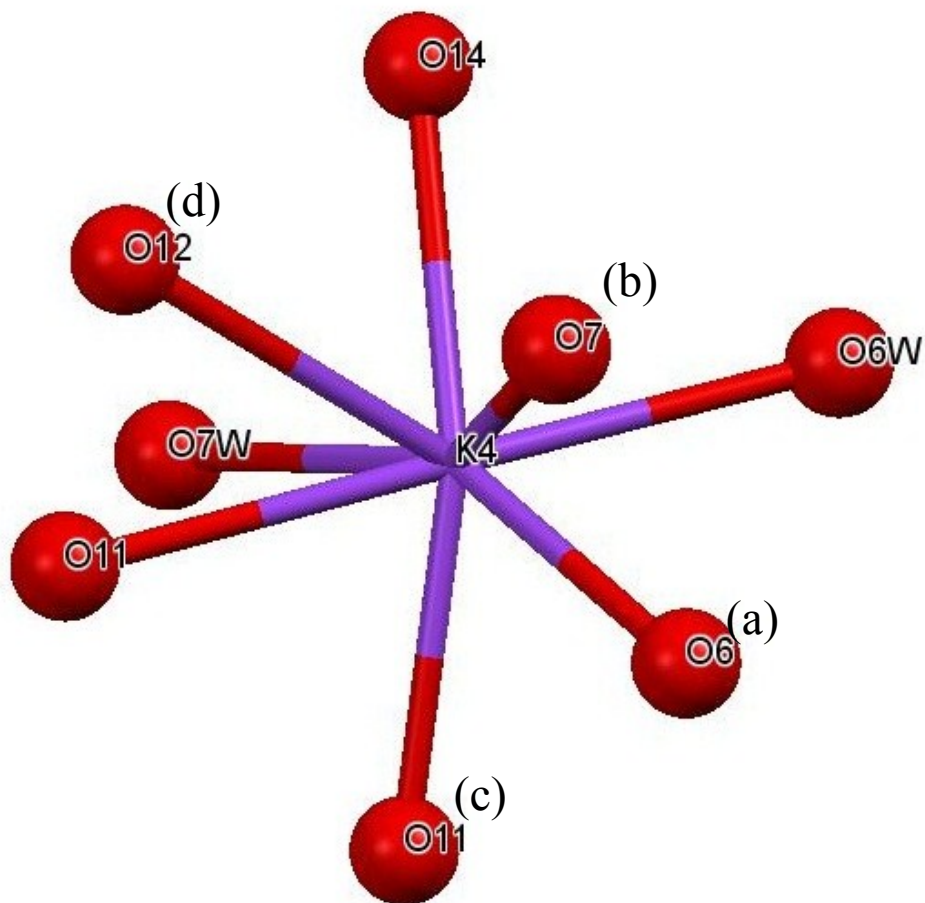

**Fig. S4:** Coordination environment of K4. It coordinated to two water molecules (O6W, O7W), six sulfonic acid oxygens (O6,<sup>a</sup>O7, <sup>b</sup>O11,<sup>c</sup> O12,<sup>d</sup> O11, O14) of different 2 units. Symmetry elements: <sup>a</sup>,  $-x, 2-y, 1-z$ ; <sup>b</sup>,  $-x, 2-y, 1-z$ ; <sup>c</sup>,  $1-x, 2-y, 1-z$ ; <sup>d</sup>,  $1-x, 2-y, 1-z$ .

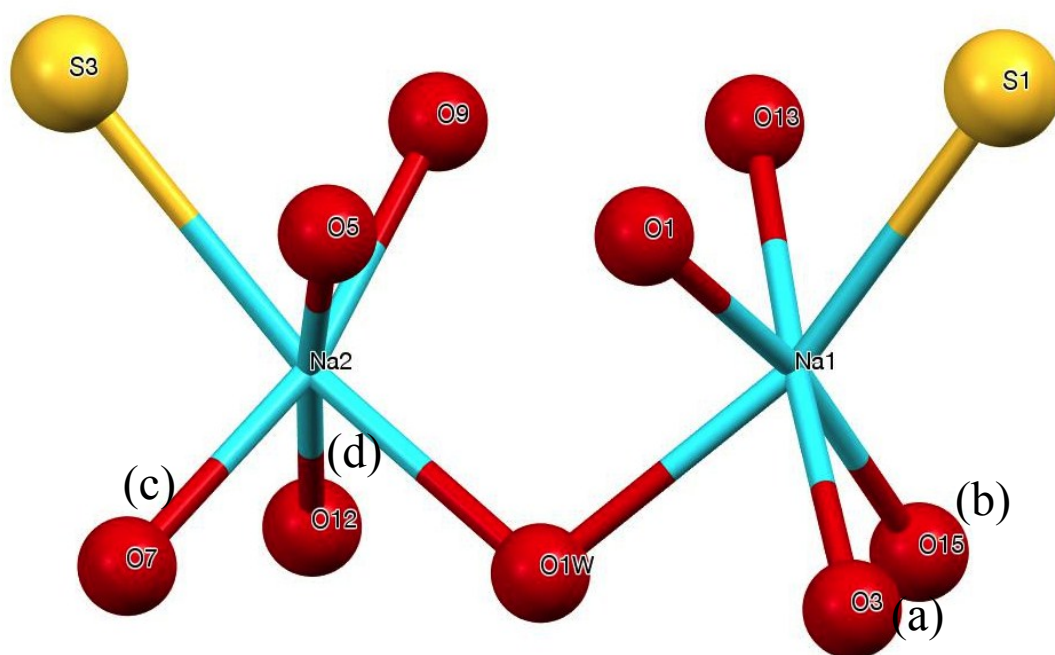

**Fig. S5:** Coordination environment of Na1, Na2. The two sodium atoms connected to each other through one bridged watermolecule (O1W) and each sodium coordinated to two phenolic oxygens (O1 & O13 to Na1, O5 & O9 to Na2), two sulfonic acid oxygens of different **2** units (O3<sup>a</sup> & O15<sup>b</sup> to Na1, O7<sup>c</sup> & O12<sup>d</sup> to Na2) and one bridged sulfur (S1 to Na1, S3 to Na2). Symmetry elements: <sup>a</sup>,  $-x, 1-y, 2-z$ ; <sup>b</sup>,  $1-x, 1-y, 2-z$ ; <sup>c</sup>,  $-x, 1-y, 1-z$ ; <sup>d</sup>,  $1-x, 1-y, 1-z$ .



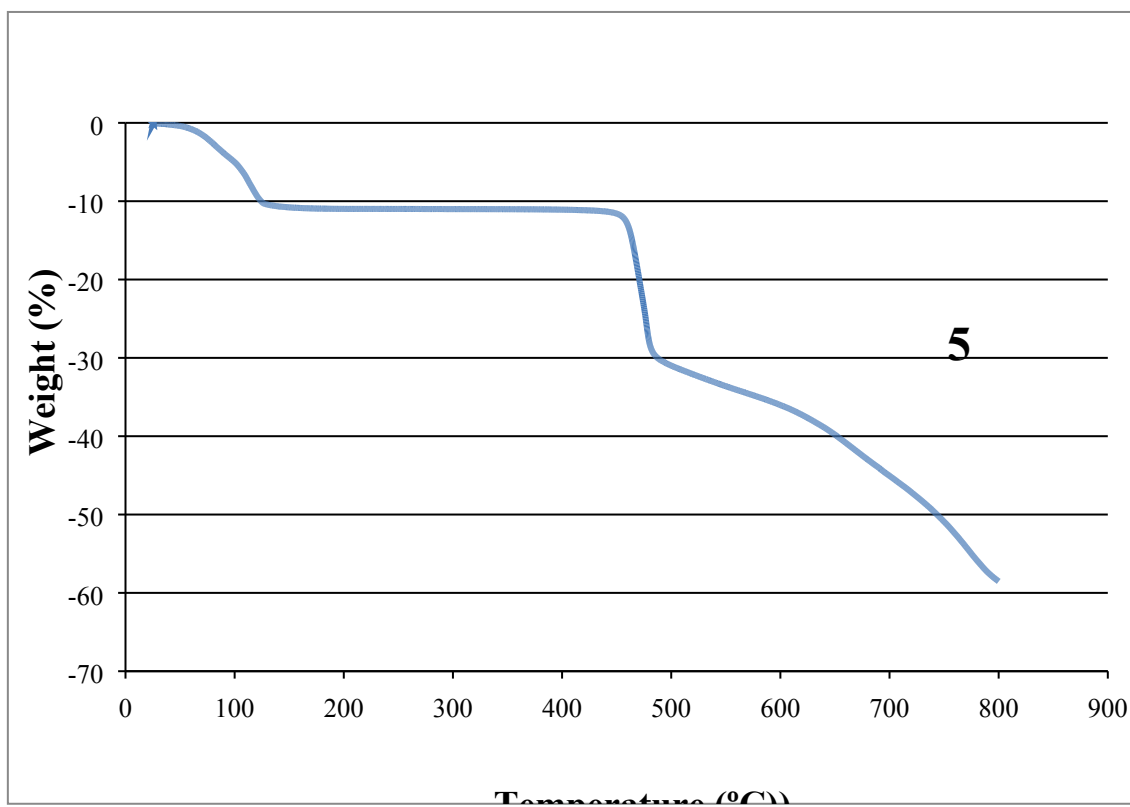

**Fig S6:** Thermogravimetric Analysis of complex **5** recorded in the temperature range between 30 and 800°C at a heating rate 10°C /min.

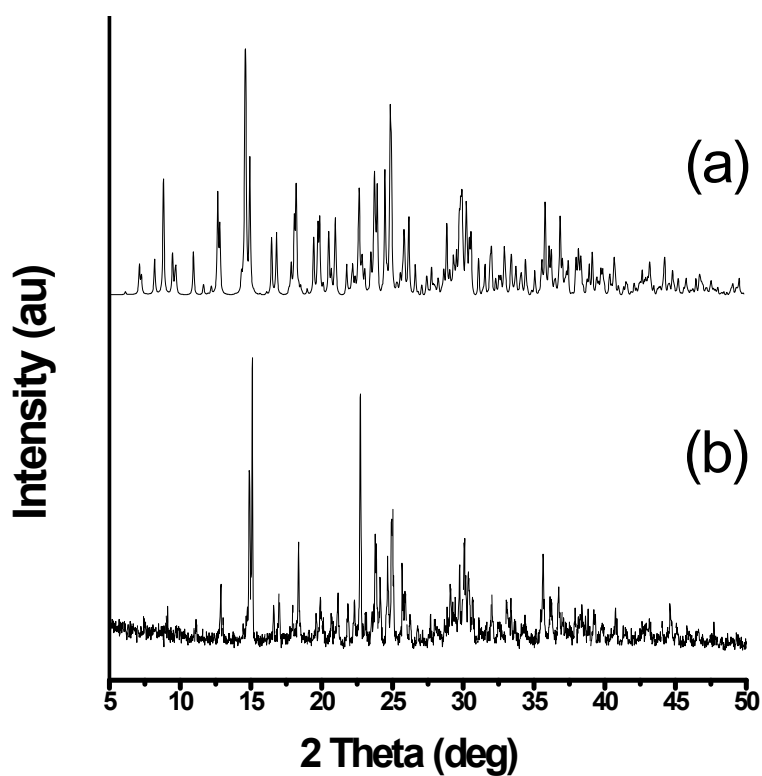

**Fig S7:** (a) Calculated powder X-ray diffraction (PXRD) patterns from crystal structure of complex **5** (b) PXRD patterns of grinded crystals of complex **5** in oil.
